# Supplementary material for: An integrated “Engage & Evasion” approach for mononuclear phagocyte system escape and efficient extracellular vesicle therapy
Source: PubMed Central journal article supplement (PMC11658260; doi:10.1186/s12951-024-03032-z), 2024-12-19
Supplement: 12951_2024_3032_MOESM1_ESM.pdf [file 12951_2024_3032_MOESM1_ESM.pdf]

## Supplementary data

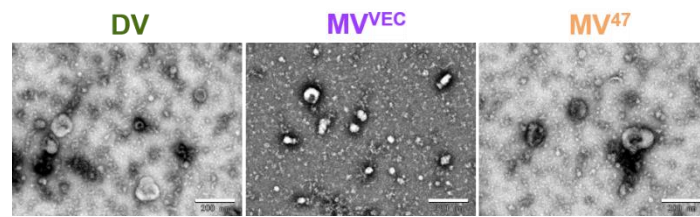

**Figure S1.** TEM image for EV morphology at lower scale. Scale bar = 200 nm.

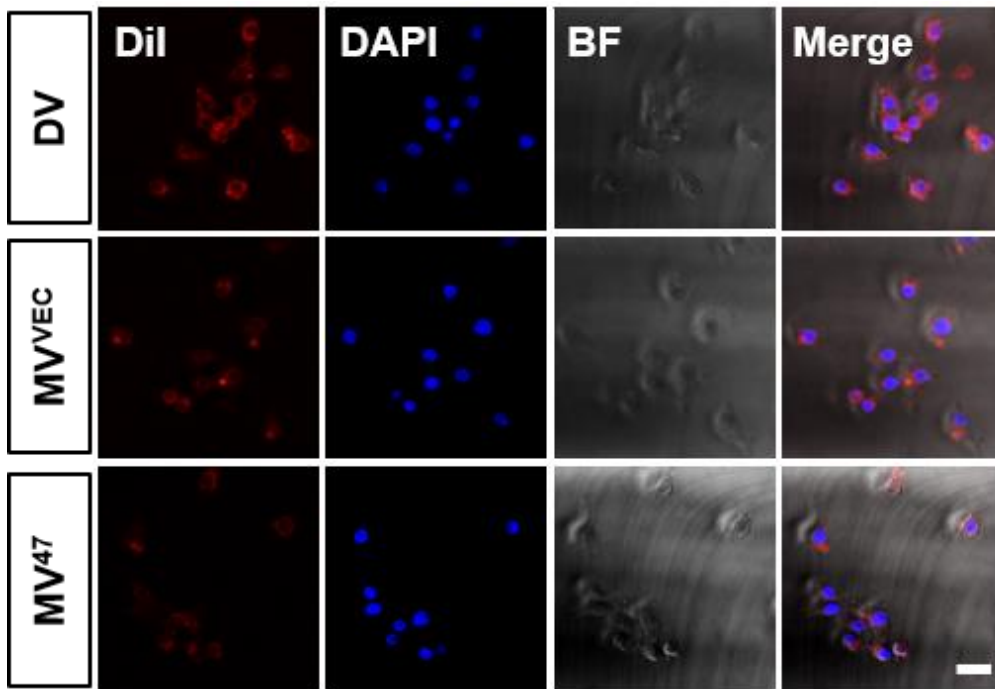

**Figure S2. Differential Uptake of DV and MV<sup>47</sup> by Macrophages.** RAW264.7 macrophages were incubated with Dil-labeled EVs for 4 h. Representative images showing EV uptake. Scale bar = 20  $\mu$ m.

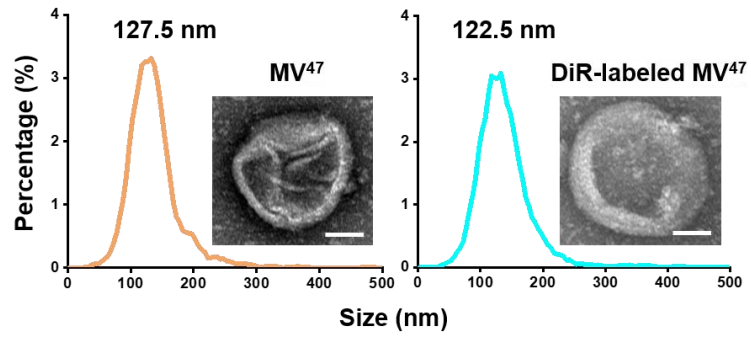

**Figure S3. Characterization of DiR-labeled MV<sup>47</sup>.** Morphology and size distribution of DiR-labeled EVs were examined using transmission electron microscopy (TEM) and nanoparticle tracking analysis (NTA), respectively. Scale bar = 50 nm.

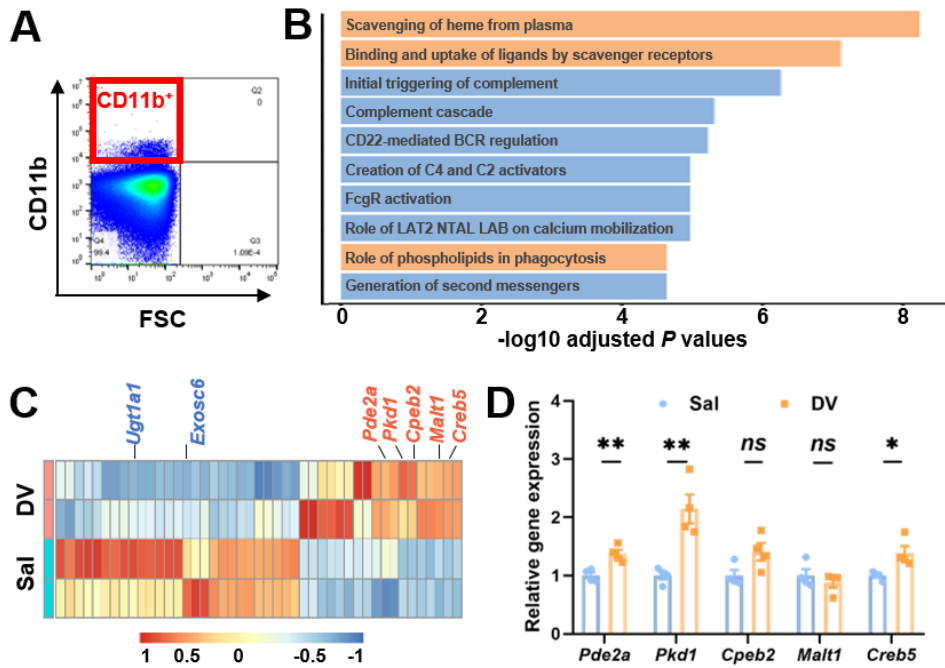

**Figure S4. RNAseq analysis of DV-primed Kupffer cells.** (A) Schematic illustration depicting the CD11b<sup>+</sup> Kupffer cell sorting pattern. (B) Macrophage activity-related Reactome pathway analysis in DV-primed Kupffer cells, color-coded to indicate phagocytosis-related pathways (orange). (C) Hierarchical clustering of differentially expressed genes between control and DV-primed Kupffer cells 24 hours post-injection, with red and blue colors representing upregulated and downregulated genes, respectively. (D) mRNA expression of selected RNAseq candidates in DV-primed RAW264.7 cells ( $n = 4$ ). Statistical evaluations were conducted using unpaired Student's *t*-test. Results were presented as mean  $\pm$  SEM (\*  $P < 0.05$ ; \*\*  $P < 0.01$ ; *ns*: not significant).

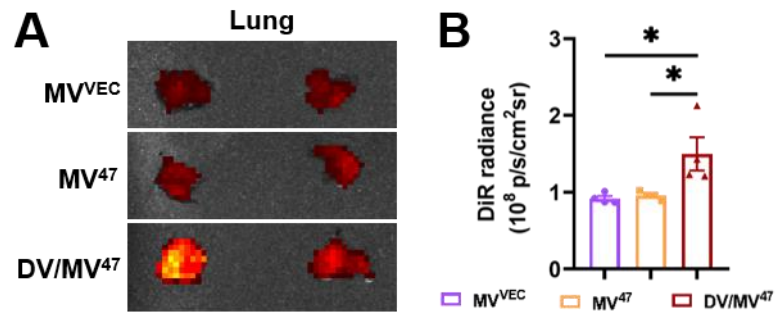

**Figure S5. *In Vivo* Biodistribution of Therapeutic MV<sup>47</sup>.** Representative DiR optical images alongside quantification of biodistribution in the lung ( $n = 4$ ). Statistical evaluations were conducted using one-way ANOVA. Results were presented as mean  $\pm$  SEM (\*  $P < 0.05$ ).
